# Supplementary material
Source: PubMed Central journal article supplement (PMC3277358)
Supplement: supp_blood-2011-05-355628_Document1.pdf [file supp_blood-2011-05-355628_Document1.pdf]

## **Results**

We investigated if human platelets shed GPIb $\alpha$  and GPV in similar fashion to mouse platelets. Refrigeration for 24 or 48 h led to a progressive loss of GPIb $\alpha$  and GPV, but not GPIX or  $\beta$ 3, from the platelets, as determined by flow cytometry using specific antibodies (Fig. 1A). The metalloprotease inhibitor GM6001 inhibits the shedding of GPIb $\alpha$  (Fig. 1A) and GPV (not shown). We confirmed that glyocalicin is released into the media by immunoblotting of refrigerated platelets versus the storage plasma using the specific anti GPIb $\alpha$  antibody SZ2 (Fig. 1B).

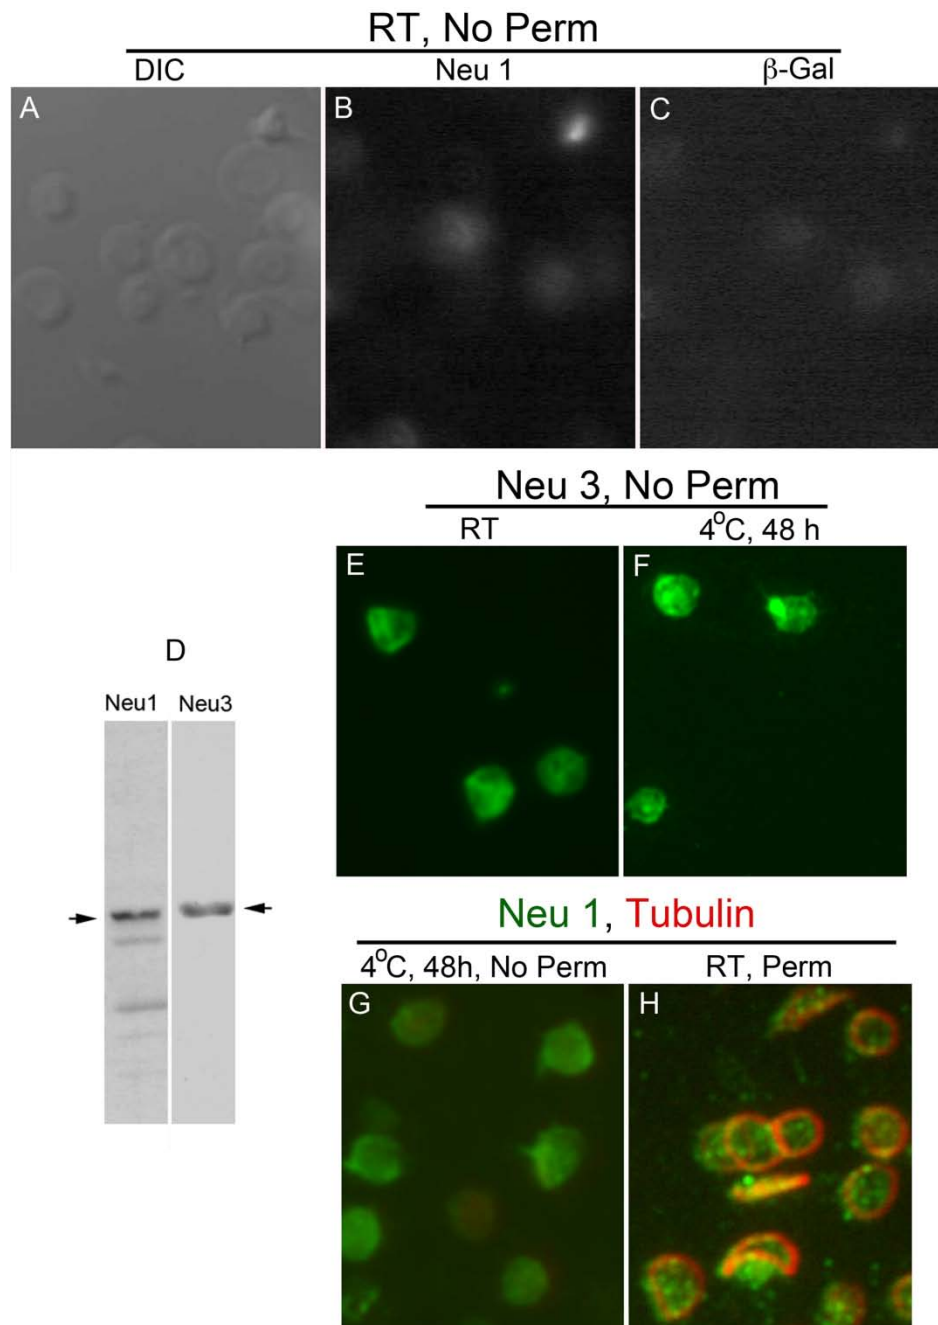

**Figure S1. Resting human platelet do not label with anti-Neu1 or anti- $\beta$ -Gal antibodies in the absence of detergent treatment**

(A) DIC image, (B) anti-Neu1 labeling (C) anti- $\beta$ -gal labelling. (D) Immunoblot for Neu1 and Neu 3 in lysates of normal human platelets. (E, F) Neu 3 is found on the surface for both resting and refrigerated platelets. (G, H) Refrigeration does not permeabilize platelets. (G) Fixed refrigerated platelets were stained for Neu1 (green) and  $\beta$ 1-tubulin (red). Note the absence of tubulin staining in the refrigerated platelets. (H) Fixed resting platelets stained for Neu1 (green) and  $\beta$ 1-tubulin (red) after detergent permeabilization.

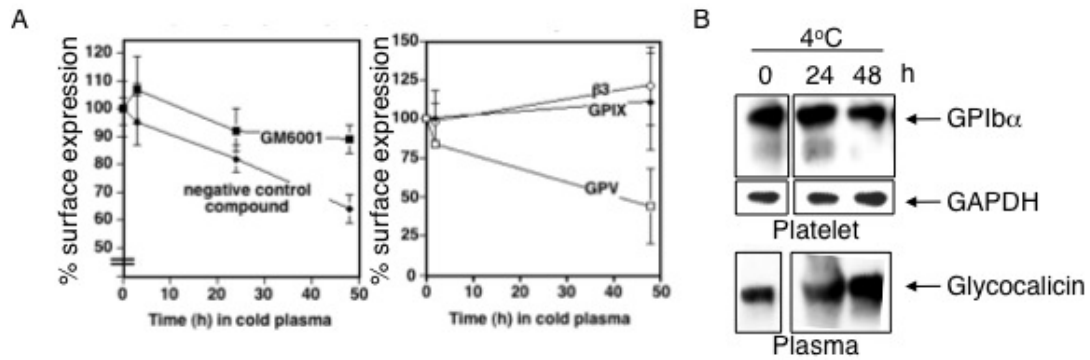

**Figure S2.** (A) GPIb $\alpha$ , GPV, GPIX, and  $\beta$ 3 surface expression was assessed by flow cytometry. Human platelets were stored in plasma in the presence or absence of 100  $\mu$ M GM6001 for the indicated time points. GPIb $\alpha$  expression is the average derived from labeling platelets with 6 different anti-GPIb $\alpha$  mAbs (WM23, AN51, 6D1, VM16d, SZ2, and HIP1)  $n = 4$  (left panel). GPV, GPIX, and  $\beta$ 3 surface expression were also measured by flow cytometry (right panel). Expression at time 0 was set as 100%. Results are expressed relative to the amount of GPIb $\alpha$  on fresh platelets (mean % relative to time 0  $\pm$  s.e.m.),  $n=5$ . (B) Immunoblot for GPIb $\alpha$  in lysates of human platelets refrigerated for 0, 24 and 48 h and glyocalicin released into plasma (lower panel). GAPDH is used as a loading control (upper panel).
